# Low-level carbon monoxide exposure affects BOLD FMRI

Caroline Bendell <sup>a</sup>, Shakeeb H. Moosavi <sup>a</sup>, Mari Herigstad <sup>a,b</sup>

<sup>a</sup> Biological and Medical Sciences, Oxford Brookes University

<sup>b</sup> Academic Unit of Radiology, Department of Infection, Immunity and Cardiovascular Disease, University of Sheffield

**Corresponding Author:** Mari Herigstad,

Address: Academic Unit of Radiology, University of Sheffield, S10 2RX Sheffield, UK.

Email: [m.herigstad@sheffield.ac.uk](mailto:m.herigstad@sheffield.ac.uk)

**Keywords:** Carbon monoxide, smoking, BOLD FMRI confounds

**Funding:** This study was funded by the Oxford Brookes University Central Research Fund.

**Author contributions:** MH conceived of the study, designed the study, collected and analysed the data, and drafted the manuscript. CB contributed to study design, data collection, analysis, and drafting of the manuscript. SHM contributed to study design and drafting of the manuscript. All authors gave final approval for publication.

## ABSTRACT

Blood Oxygen Level Dependent (BOLD) fMRI is a common technique for measuring brain activation that could be affected by low-level carbon monoxide (CO) exposure from e.g. smoking. This study aimed to probe the vulnerability of BOLD fMRI to CO and determine whether it constitutes a significant confound in neuroimaging and clinical trials. Low-level (6ppm exhaled) CO effects on BOLD signal were assessed in 12 healthy never-smokers on two separate experimental days (CO and air control). fMRI tasks were breath-holds (hypercapnia), visual stimulation and fingertapping. CO significantly dampened global BOLD fMRI signal during hypercapnia and visual cortex activation during visual stimulation. During fingertapping, CO reduced visual cortex activation but increased premotor cortex activation. Behavioural and physiological measures remained unchanged. We conclude that BOLD fMRI is vulnerable to CO, possibly through baseline increases in CBF, and suggest exercising caution when imaging populations exposed to elevated CO levels, e.g. with high smoking prevalence.

## INTRODUCTION

One of the most common methods used to measure brain function in humans is fMRI, of which Blood Oxygen Level Dependent (BOLD) fMRI is arguably the most mainstream technique. BOLD fMRI is an indirect measure of brain activation, based on changes in the ratio of oxygenated to deoxygenated blood in the brain, which depends on cerebral metabolic rate (CMRO<sub>2</sub>), cerebral blood volume (CBV) and cerebral blood flow (CBF). These factors may be altered as part of the experimental design or as unintended confounds, potentially affecting BOLD signal.

Carbon monoxide (CO) is a cerebral vasodilator (1, 2). Increases in CBF with elevations in CO has been shown in animal models (2-6) as well as in humans (7, 8). Low-level CO exposure is common, in particular through inhalation of cigarette smoke. Smokers typically have elevated carboxyhaemoglobin (COHb) levels (6ppm in exhaled air or above (9)) compared to non-smokers (1-5ppm). As smoking behaviour is associated with e.g. socioeconomic status and disease status, elevated COHb may significantly influence neuroimaging results on the group level in such demographics. If CO causes a baseline increase in CBF, the capacity for further local vasodilation and thus detectable BOLD signal could be reduced. As the BOLD signal for any given task is assessed by comparing task-related signal to baseline signal, this altered baseline could artificially dampen the observed task-specific BOLD response.

One method to test cerebral vasodilation is carbon dioxide (CO<sub>2</sub>) exposure. Hypercapnia induces a strong CBF increase but no change in oxygen metabolism (10). It has been used as a cerebrovascular challenge in fMRI studies (11-13) due to its global and reproducible effect on BOLD signal (12). Increased baseline CBF can reduce the vascular responsiveness to hypercapnia, and as the BOLD response to CO<sub>2</sub> is strong, even a small increase in baseline CBF might have a discernible effect on BOLD signal. Moreover, hypercapnia can be readily introduced through breath holds (accumulating CO<sub>2</sub> in the blood stream). In this study, we therefore used the hypercapnia derived through breath holds as a tool to investigate the effect of CO on BOLD signal.

We hypothesised that low-level CO inhalation would significantly reduce global BOLD signal during hypercapnia. To determine whether the effect of CO is robust enough to extend to common fMRI paradigms, we also included a simple visual stimulation and motor task, hypothesising that CO would dampen BOLD signal in brain regions associated with these tasks.

## METHODS

### Participants

We recruited 12 (8F, age 25.3 years  $\pm$  4.3) healthy never-smokers to the study. Exclusion criteria were MRI contraindications, smoking history, history of cardiorespiratory or neurological disease, and pregnancy (women only). All participants gave written, informed consent. The study was approved by Oxford Brookes University Research Ethics Committee.

### Protocol

Participants were asked to attend a preliminary laboratory visit. During this visit, medical history and state and trait anxiety inventory (STAI) questionnaires were completed (14). A breathing test was conducted to let the participant familiarise themselves with the breathing system and the CO exposure. Participants were asked to breathe on a custom-made breathing system through a mouthpiece with their nose occluded, and were given time for their breathing to stabilise before commencing the experiment. After stable breathing had been recorded for five minutes, CO was added to the inspired air over five minutes, out of sight of the participant. Following CO administration, five more minutes of stable breathing was recorded. During the experiment, ECG, pulse pressure and saturation was continuously measured. Expired CO measurements were made before, immediately after, and 10 minutes after the breathing test (Micro+ Smokelyzer, Intermedical Ltd., Kent).

MRI scans were conducted on two separate days (Figure 1). Participants were asked to complete a state anxiety questionnaire on arrival and after the end of the experiment on each day. Whilst in the scanner, participants were asked to undertake the following tasks: breath holds, a visual stimulation task, a motor task and a simple reaction time task. We chose to investigate a set of commonly used tasks of short duration to investigate whether quantifiable differences could be observed in BOLD response due to CO even when tasks are underpowered. Breath holds were conducted end-expiration, signalled by visual cues ('Get ready' two seconds before breath hold, 'Hold your breath' during breath hold) and lasted 15 seconds, repeated 4 times with 15 second breaks in between. The visual stimulation was a flashing checkerboard (8Hz, lasting 10 seconds, separated by 10-second breaks, repeated thrice). The motor task was tapping of the right index finger, signalled by visual cues ('Tap your right index finger') and lasted 15 seconds, repeated 4 times with 15-second breaks in between. The reaction time task required participants to immediately press a button upon the

appearance of a red dot on the screen (24 appearances, random intervals). These tasks were conducted twice, once before the breathing intervention (baseline) and once after (post-intervention). On one day, the intervention was air, and on the other day, the intervention was CO. Participants were not aware of which intervention would be given on any of the days and the order of the interventions was randomised and balanced. Training in all FMRI tasks were given by an experimenter prior to the first scan on each day, to ensure that the participant could reliably complete these on their own in the scanner. Expired CO measurements were made before the first scan, immediately after the second scan (~20 minutes after the breathing intervention) and 10 minutes after the second scan (~30 minutes after the breathing intervention).

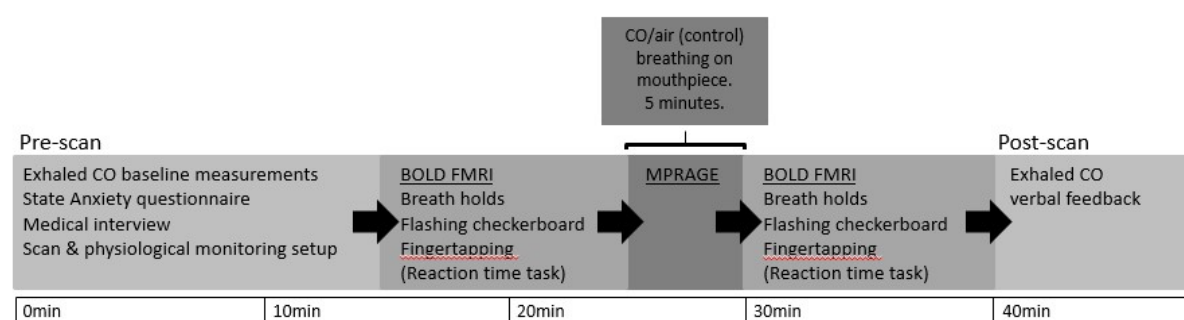

**Figure 1. Schematic of protocol.** FMRI tasks included breath-holds (end-exhalation), visual stimulation (8Hz flashing checkerboard) and a (right hand) finger-tapping task. Two sets of BOLD scans were obtained on each experimental day, separated by a 5 min breathing intervention (air or CO, order randomized and counterbalanced) during which a structural scan was acquired.

## MRI data acquisition

Imaging was performed at the University of Oxford Centre for Clinical Magnetic Resonance Research with a Siemens 3Tesla TIM-Trio scanner, using a 12-channel head coil. Participants were given two FMRI scans (BOLD echo-planar image acquisition, time repetition (TR) = 3000ms, time echo (TE) = 30ms, field-of-view = 192x192mm, voxel-size = 3x3x3mm, 45 slices) on each day, separated by the intervention period (air or CO). A structural T1-weighted, whole-brain scan (MPRAGE, TR = 2040ms, TE = 4.7ms, flip angle = 8°, voxel-size = 1x1x1mm) was used for image registration.

Heart rate (HR) and pulse oximetry (SaO<sub>2</sub>, multigas monitor, 9500, MR Equipment), ECG, respiration (respiratory bellows around the chest) and end-tidal partial pressures of oxygen

( $P_{ET}O_2$ ) and  $CO_2$  ( $P_{ET}CO_2$ ; Datex, Normocap) were continuously measured throughout the scans. ECG data was observed throughout. All other physiological data were sampled at 50Hz and recorded along with scan volume triggers via PowerLab 16/35 using LabChart (ADInstruments).

## Data Analysis

FMRI data processing was carried out within FSL (Oxford Centre for Functional Magnetic Resonance Imaging of the Brain (FMRIB) Software Library, using FEAT (FMRI Expert Analysis Tool) Version 5.98. The cluster Z threshold was set to 2.3 and a corrected cluster significance threshold to  $p=0.05$ .

Prestatistic processing of the data included MCFLIRT motion correction (15), spatial smoothing with a full-width-half-maximum Gaussian kernel of 5mm and high-pass temporal filtering (Gaussian-weighted least-squares straight line fitting, high-pass filter cut-off of 60s). FSL motion outliers was used to detect and regress out large motion artifacts. Data was modelled using FMRIB's Improved Linear Model (FILM) with local autocorrelation correction (16). Images were registered to the MNI152 standard space using an affine registration between the EPI and T1-weighted scan and a nonlinear registration between the T1-weighted scan and the MNI standard brain.

General Linear Models (GLMs) with multiple explanatory variables (EVs) incorporating timing values for the different events were designed to describe the data. A physiological noise modelling tool was used to regress out effects of physiological noise (17), and  $CO_2$  measurements added as a separate regressor in the GLM for all tests. A 6-second haemodynamic delay was assumed and contrast images were used for higher-level analyses as appropriate.

A fixed-effects model was used to generate contrast of parameter estimate (COPE) images of the difference between the baseline and post-intervention scans for each participant on each experimental day. This was done by forcing random effects variance to zero in FLAME (FMRIB's Local Analysis of Mixed Effects) (18, 19). Means of all COPE images were calculated for both protocols. Group analyses compared COPE images between protocols for each task using a whole-brain approach. In the group analyses, contrasts of interest were  $CO_2$  fluctuations with breath holds, presentation of flashing checkerboards (visual task) and finger-tapping.

STAI questionnaires were scored according to their respective manuals and compared between sessions using nonparametric t-tests (Mann-Whitney U test). Physiological data was analysed using custom-written MATLAB scripts and compared using Student's t-tests. Data obtained during the motor task was used for comparison of end-tidal gases between protocols.

## RESULTS

Participant details and behavioural data are presented in Table 1, and physiological data is presented in Table 2.

### Psychological and physiological data

There were no significant differences between protocols in anxiety scores ( $p=0.55$ ) or reaction times ( $p=0.29$ , adjusted for baseline scores). None of the participants was able to discern between CO and air inhalations when prompted.  $P_{ET}O_2$  was significantly reduced between baseline and post-intervention scans in both protocols, but no significant difference was found between protocols ( $p=0.57$ ). There was no change in  $P_{ET}CO_2$  or HR between scans or protocols. CO values increased significantly in the CO protocol ( $p<0.0001$ , Figure 2), but not air ( $p=0.29$ ). CO exposure increased average exhaled CO from  $2.9\pm 1.0$  ppm to  $5.7\pm 1.0$  ppm.

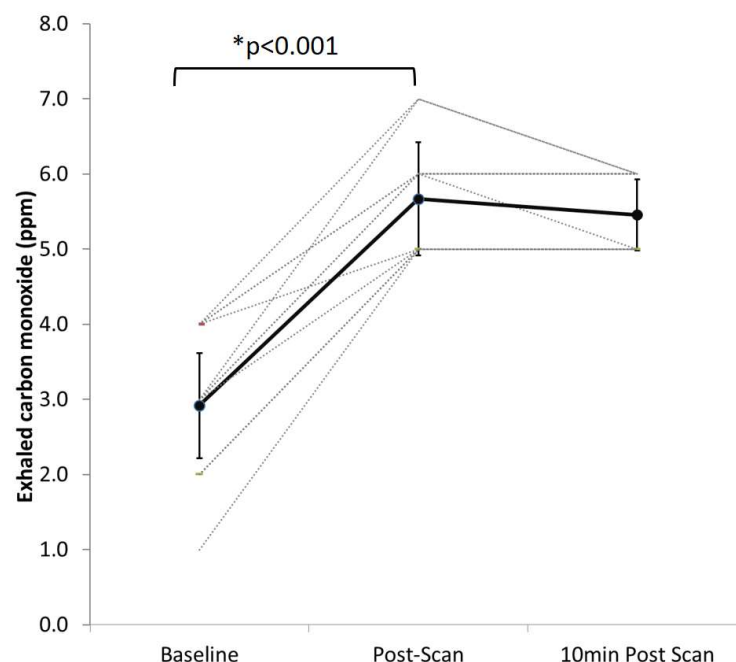

**Figure 2. Exhaled CO (ppm).** Baseline, post-scan (~20 min after end-inhalation) and 10 min post-scan (~30 min after end-intervention). Individual values plus average and standard deviation (bold line).

| <b>Table 1. Participant details and behavioural data</b> |                    |                    |                    |
|----------------------------------------------------------|--------------------|--------------------|--------------------|
|                                                          | preliminary visit  | MRI visit (CO)     | MRI visit (Air)    |
| Sex (F/M)                                                | 8/4                | 8/4                | 8/4                |
| Age (years)                                              | 25.3 (4.3)         | 25.3 (4.3)         | 25.3 (4.3)         |
| BMI (kg/m <sup>2</sup> )                                 | 23.6 (3.0)         | 23.6 (3.0)         | 23.6 (3.0)         |
| Trait anxiety score                                      | 35.4 (7.2) [23-47] | N/A                | N/A                |
| State anxiety score                                      | 31.1 (8.6) [21-55] | 27.0 (4.3) [21-35] | 28.2 (4.4) [23-37] |
| Change in average reaction time (post > pre)             | N/A                | 15.2 (24.3)        | 10.0 (21.8)        |

Participant details (n=12), averages +/- standard deviation. Range is provided for anxiety scores. BMI=body mass index

| <b>Table 2. Physiological data</b> |                |                   |                 |                   |
|------------------------------------|----------------|-------------------|-----------------|-------------------|
|                                    | MRI visit (CO) |                   | MRI visit (Air) |                   |
|                                    | Baseline       | Post-intervention | Baseline        | Post-intervention |
| PETCO <sub>2</sub> (%)             | 5.5 (0.7)      | 5.5 (0.7)         | 5.3 (0.7)       | 5.4 (0.7)         |
| PETO <sub>2</sub> (%)              | 15.5 (1.2)     | 15.0 (0.9)*       | 15.5 (0.7)      | 14.9 (0.7)**      |
| HR (bpm)                           | 69.3 (12.5)    | 66.2 (8.3)        | 71.3 (15.0)     | 63.5 (8.2)        |
| CO (ppm)                           | 2.9 (1.0)      | 5.7 (1.0)***      | 3.1 (0.9)       | 2.7 (0.8)         |
| COHb (%)                           | 1.1 (0.1)      | 1.5 (0.2)***      | 1.1 (0.1)       | 1.1 (0.1)         |

Physiological data (obtained during the motor task before and after breathing intervention), averages +/- standard deviation. PETCO<sub>2</sub>=end-tidal carbon dioxide, PETO<sub>2</sub>=end-tidal oxygen, HR=heart rate, CO=carbon monoxide, COHb=carboxyhemoglobin. PETCO<sub>2</sub>, PETO<sub>2</sub> and HR obtained during visual activation task. Exhaled CO obtained pre-MRI and post-MRI (20-25 min after CO delivery) and presented both as exhaled CO (ppm) and calculated COHb (%). T-tests within visit \*p<0.05, \*\*p<0.01, \*\*\*p<0.0001. No significant differences were found between visits.



## FMRI data

For reported FMRI results, significance denotes thresholded, cluster corrected, activation ( $p < 0.05$ ).

*Breath hold task (Figure 3).* The rise in CO<sub>2</sub> with breath holds caused signal increase throughout the grey matter during all scans. Mean global signal was markedly lower following the CO intervention compared to baseline scans and after the control (air) intervention. Group comparisons showed reduction in activation in the CO protocol compared to air in the left operculum and insula, left middle and inferior frontal gyri, left dorsolateral prefrontal cortex, left lateral occipital cortex, left supramarginal and angular gyri and the brain stem.

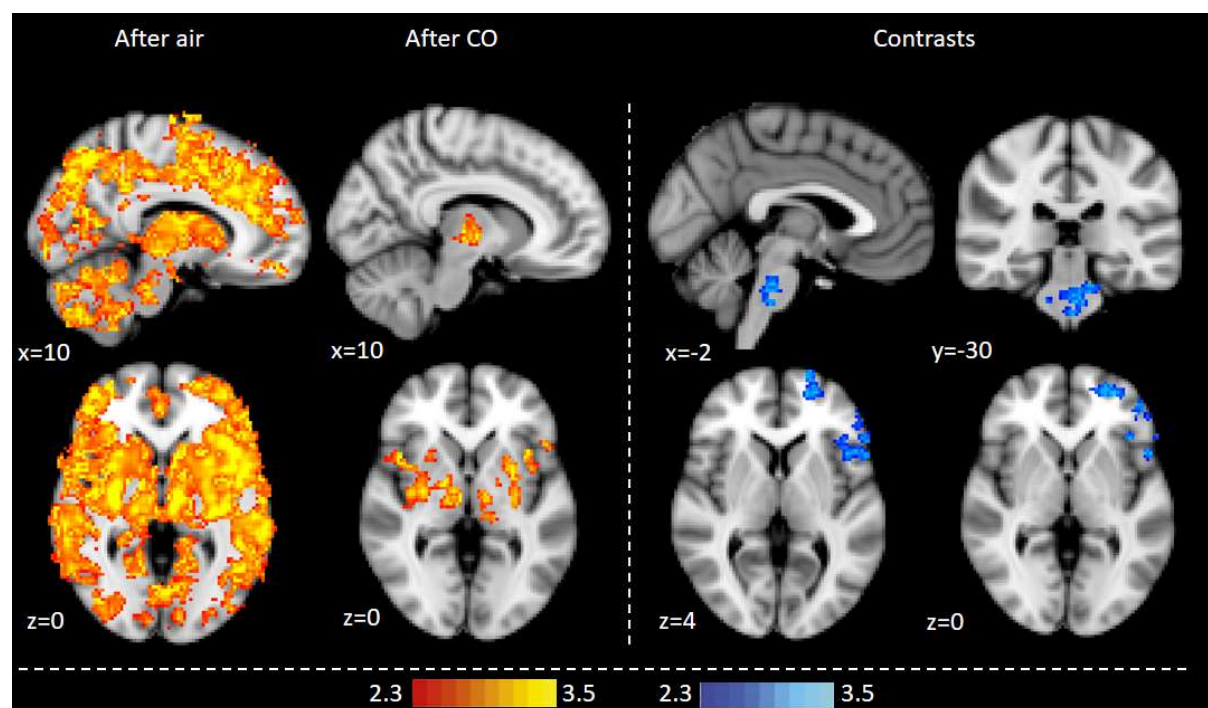

**Figure 3. BOLD FMRI activation with CO<sub>2</sub> variation (breath holds).** Whole-brain analysis, cluster level corrected for multiple comparisons at  $p < 0.05$ . Maps represent mean activation after air and CO inhalation, and contrasts between protocols. Air > CO (blue-lightblue).

*Visual task (Figure 4).* The flashing checkerboard generated activation in the visual cortex (mean activation) for all scans. Group comparisons showed lower activation in the CO protocol compared to air in the visual cortex, right thalamus and left middle temporal gyrus.

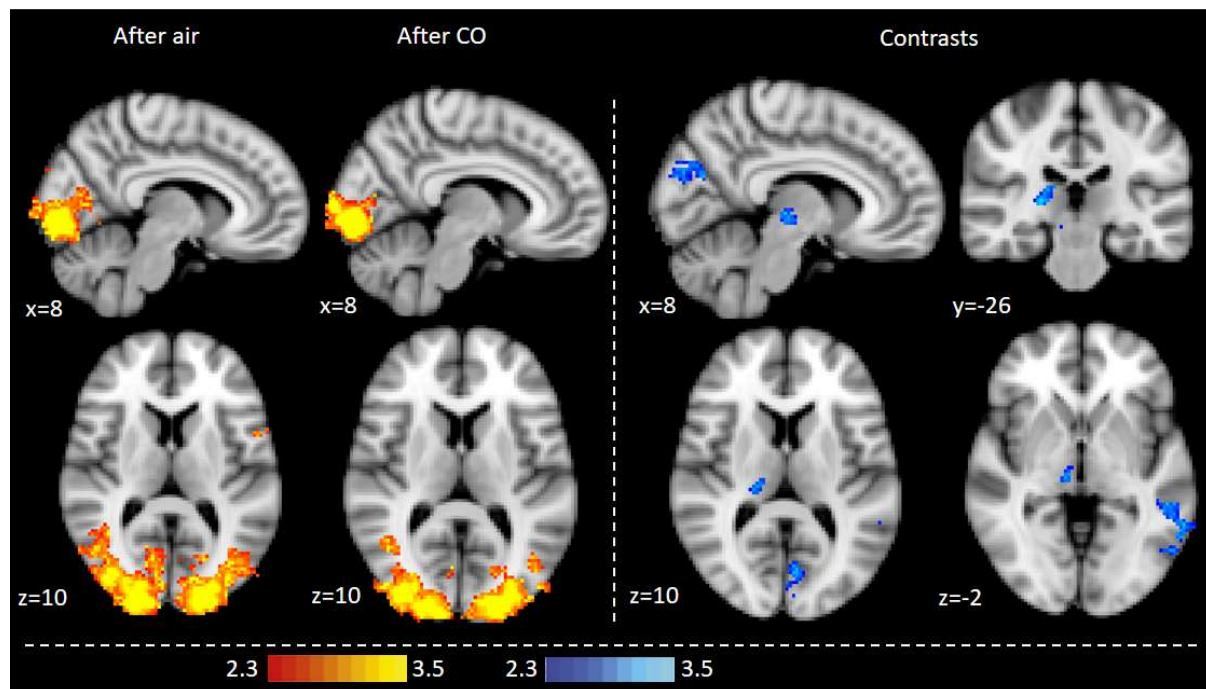

**Figure 4. BOLD FMRI activation during visual stimulus.** Whole-brain analysis, cluster level corrected for multiple comparisons at  $p < 0.05$ . Maps represent mean activation after air and CO inhalation, and contrasts between protocols. Air>CO (blue-lightblue).

*Motor task (Figure 5).* The finger-tapping task generated activation in the left primary and secondary somatosensory cortices, the left premotor and primary motor cortices, the left thalamus and the visual cortex for all scans. Group comparisons showed reduced activation in the CO protocol compared to air in the visual cortex and increased activation in the CO protocol compared to air in the premotor cortex.

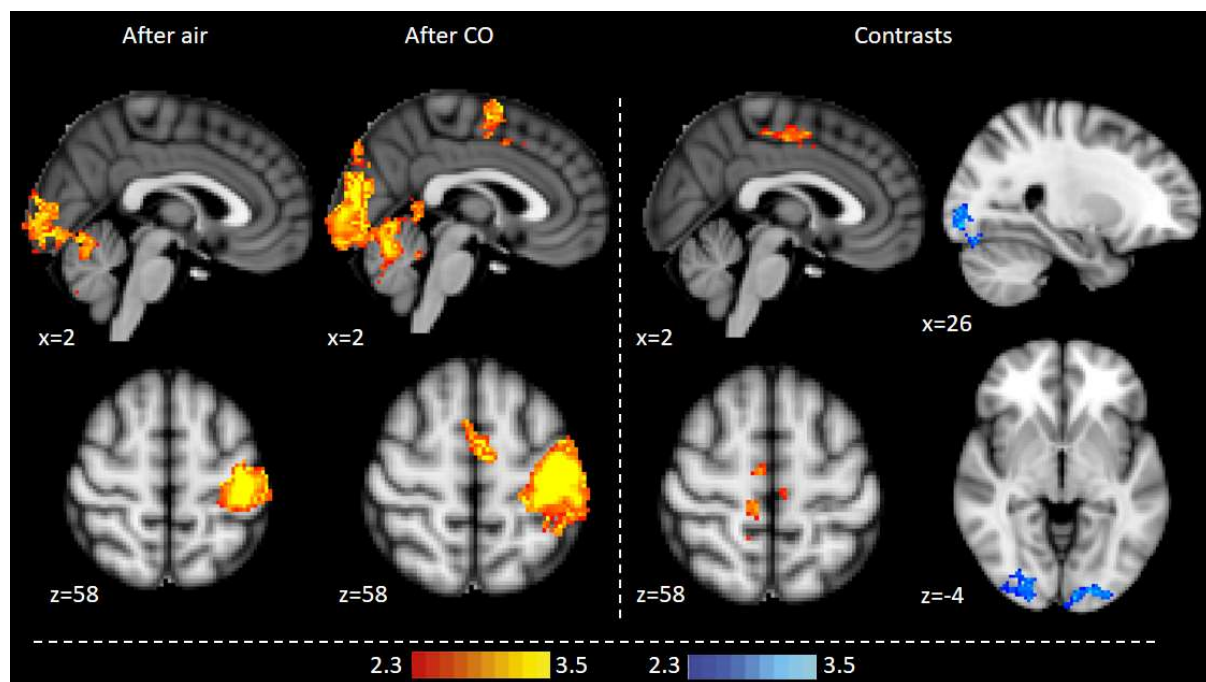

**Figure 5. BOLD FMRI activation during motor task.** Whole-brain analysis, cluster level corrected for multiple comparisons at  $p < 0.05$ . Maps represent mean activation after air and CO inhalation, and contrasts between protocols. Air>CO (blue-lightblue); CO>Air (red-yellow).

## DISCUSSION

### Key findings

In this study we show that a small amount of inhaled CO, raising expired levels from 3ppm to 6ppm, significantly alters BOLD signal in never-smokers. This suggests that CO is a non-negligible confound in BOLD FMRI, in particular for studies involving populations regularly exposed to CO (e.g. smokers), even in low doses. Systematic differences in COHb between a patient group consisting of a greater proportion of smokers and a control group of predominantly non-smokers could generate group differences that are CO-related rather than associated with the specific research outcome. This could significantly affect the results of clinical trials and patient-oriented neuroscience research.

### Discussion of findings

Studies have shown that global baseline increases in CBF can reduce task-related BOLD signal as the capacity for further local vasodilation is reduced. Cohen et al. (20) used experimentally induced hypercapnia to reduce visual activation, and Brown et al. (21) showed that the cerebral vasodilator acetazolamide can dampen motor activation. Yet this effect has not yet been linked to CO exposure and smoking. Smoking is associated with a range of diseases, including

cardiorespiratory diseases, cancers, dementia and cognitive decline (22) and several mental disorders (23), as well as demographic factors such as socioeconomic status, education and income level (24). CO exposure through cigarette smoking could therefore constitute a significant confound in neuroimaging research.

To probe the vulnerability of the BOLD signal to COHb elevation, we employed a low-level increase in inhaled CO, raising exhaled levels to the lowest associated with tobacco smoking. Using this minimal level, we observed significant effects on BOLD signal during not only a hypercapnic challenge but also commonly used visual and motor tasks. The large impact of low-level CO exposure on common fMRI paradigms such as a simple flashing checkerboard and finger-tapping tasks highlights the relevance of the present findings. Furthermore, the present study consisted of a comparatively small sample of healthy volunteers. Any effects of CO in larger experimental samples are likely to be more robust, further underlining the need to employ care when selecting study populations and recruitment strategies for research involving potentially unbalanced groups of smokers versus non-smokers.

The effect of CO on BOLD signal was not uniform. BOLD signal was reduced after CO exposure in regions associated with breathing and breathlessness during hypercapnia (12, 25, 26), and in the right thalamus, left middle temporal gyrus and visual cortex during the flashing checkerboard (27). However, during the finger-tapping task, CO reduced visual cortex signal (possibly associated with the visual instructions on screen) but unexpectedly also increased motor cortex signal compared to air. This BOLD signal increase appears to contradict the hypothesis that increases in CBF with CO act simply to dampen signal. It has been suggested that hypercapnia may affect BOLD signal differently depending on the type of task and activated brain regions (28). For example, Kastrup et al. (29) reported that BOLD signal changes with hypercapnia were greater in the visual cortex than in the sensorimotor cortex, possibly due to the location of large veins and/or neural activity associated with respiratory stimuli (28). Taken together, this suggests that CO does not have a simple, uniform effect on BOLD signal, but, like hypercapnia, may depend on task and/or region.

## **Implications for neuroimaging and clinical trials**

In this study, we show that even low-level CO exposure may significantly alter BOLD signal. Due to its affinity for haemoglobin, CO is not readily removed and therefore its effects on signal could persist for some time following inhalation. Here, CO assessments made following the scan (approximately 20 and 30 min after the intervention) show steady, elevated levels of

exhaled CO (Figure 2). This level of CO exhalation is at the lower end of that associated with smokers, with mean exhaled values being more than 20ppm in outpatient groups (9). It remains unknown if higher levels of CO exposure will have a greater effect (i.e. a dose-dependent effect similar to that observed in rat aortas (30)). Furthermore, the findings observed in this paper suggest that the effect may be region- or task-dependent, which could complicate any potential adjustments for COHb during analysis. This indicates that CO is an important confound in BOLD FMRI, even in low doses, and its effect sufficiently robust to induce statistically significant changes in even small study populations.

Smoking habit is associated with several diseases, from cardiorespiratory disease and cancer to schizophrenia. Clinical trials in which FMRI is used as an outcome measure may therefore be susceptible to differences in CO exposure. Differences in COHb may occur both longitudinally (if the participants are encouraged to stop smoking as part of their treatment) and whenever patients are compared with controls that are not precisely matched for smoking behaviour. Furthermore, the possibility for dose-dependent effects means that it may not be sufficient to match simply for ‘smoker’ and ‘non-smoker’, but rather the amount of COHb present in the blood stream. Given that only a small increase in COHb may affect BOLD signal, this confound should be monitored carefully, particularly in clinical trials.

## Potential mechanisms

As absolute CBF was not measured in the present study, we cannot be certain that CBF was the cause of the observed dampening of the BOLD response. Indeed, as suggested previously, the mechanism underlying CO mediation of BOLD signal may be more complex. Other mechanisms may contribute to the observed BOLD signal change. For example, the formation of COHb at the expense of oxyhaemoglobin may cause increased CBF through the development of hypoxia (31). While we observed reduced  $P_{ET}O_2$  during the second scan on each experimental day, this was similar for both protocols, and may thus rather be due to altered breathing patterns during the experimental protocol despite pre-scan acclimatization to the breathing system. Furthermore,  $P_{ET}O_2$  remained within normal range throughout the experiment. It is therefore unlikely that hypoxia is the cause of the observed group differences. CO may also slightly inhibit cell respiration even under normoxic conditions (32) and it remains unknown whether the observed effect on BOLD signal is linked in full or part to metabolic modulation. Similarly, we cannot rule out the possibility that CO altered BOLD signal through its role as an endogenous neurotransmitter (33). Participants showed no change



in reaction times with CO compared to air, no difference in anxiety scores, and were not able to tell which protocol they were undertaking when prompted. It is thus unlikely that the effect on BOLD signal observed in our study is driven by behavioural factors. While further work is required to elucidate the precise mechanism underlying our findings, it is clear that CO alters BOLD signal and should be considered a non-negligible neuroimaging confound.

## Conclusions

We conclude that even small amounts of inhaled CO can significantly alter BOLD signal during simple tasks such as breath hold, visual and finger-tapping tasks. Further research is required to assess the precise underlying mechanism of this effect. Care should be taken to control for CO as a confound in neuroimaging research when appropriate, for example in studies on clinical populations with greater/lower prevalence of smokers.

## ACKNOWLEDGEMENTS

We would like to thank Steve Knight for his generous assistance with data collection, and Dr Olivia Faull, Dr Anja Hayen and Dr Kyle Pattinson for their invaluable feedback on the analysis and manuscript. This study was funded by the Oxford Brookes University Central Research Fund.

## COMPETING INTERESTS

None of the authors has any competing interests to declare.

## REFERENCES

1. Hanafy KA, Oh J, Otterbein LE. Carbon Monoxide and the brain: time to rethink the dogma. *Curr Pharm Des* 2013; 19: 2771-2775.
2. Komuro T, Borsody MK, Ono S, Marton LS, Weir BK, Zhang ZD, Paik E, Macdonald RL. The vasorelaxation of cerebral arteries by carbon monoxide. *Exp Biol Med (Maywood)* 2001; 226: 860-865.
3. Kanu A, Whitfield J, Leffler CW. Carbon monoxide contributes to hypotension-induced cerebrovascular vasodilation in piglets. *Am J Physiol Heart Circ Physiol* 2006; 291: H2409-2414.

4. Doblar DD, Santiago TV, Edelman NH. Correlation between ventilatory and cerebrovascular responses to inhalation of CO. *J Appl Physiol Respir Environ Exerc Physiol* 1977; 43: 455-462.
5. Meilin S, Rogatsky GG, Thom SR, Zarchin N, Guggenheimer-Furman E, Mayevsky A. Effects of carbon monoxide on the brain may be mediated by nitric oxide. *J Appl Physiol* 1996; 81: 1078-1083.
6. Mendelman A, Zarchin N, Meilin S, Guggenheimer-Furman E, Thom SR, Mayevsky A. Blood flow and ionic responses in the awake brain due to carbon monoxide. *Neurol Res* 2002; 24: 765-772.
7. Benignus VA, Petrovick MK, Newlin-Clapp L, Prah JD. Carboxyhemoglobin and brain blood flow in humans. *Neurotoxicol Teratol* 1992; 14: 285-290.
8. Paulson OB, Parving HH, Olesen J, Skinhoj E. Influence of carbon monoxide and of hemodilution on cerebral blood flow and blood gases in man. *J Appl Physiol* 1973; 35: 111-116.
9. Middleton ET, Morice AH. Breath carbon monoxide as an indication of smoking habit. *Chest* 2000; 117: 758-763.
10. Kim SG, Ugurbil K. Comparison of blood oxygenation and cerebral blood flow effects in fMRI: estimation of relative oxygen consumption change. *Magn Reson Med* 1997; 38: 59-65.
11. Rostrup E, Law I, Blinkenberg M, Larsson HB, Born AP, Holm S, Paulson OB. Regional differences in the CBF and BOLD responses to hypercapnia: a combined PET and fMRI study. *Neuroimage* 2000; 11: 87-97.
12. Pattinson KT, Governo RJ, MacIntosh BJ, Russell EC, Corfield DR, Tracey I, Wise RG. Opioids depress cortical centers responsible for the volitional control of respiration. *J Neurosci* 2009; 29: 8177-8186.
13. Pattinson KT, Rogers R, Mayhew SD, Tracey I, Wise RG. Pharmacological FMRI: measuring opioid effects on the BOLD response to hypercapnia. *J Cereb Blood Flow Metab* 2007; 27: 414-423.
14. Spielberger CD, Gorsuch RL, Lushene R, Vagg PR, Jacobs GA. Manual for the State-Trait Anxiety Inventory. Palo Alto, California, USA: Consulting Psychologists Press; 1989.
15. Jenkinson M, Bannister P, Brady M, Smith S. Improved optimization for the robust and accurate linear registration and motion correction of brain images. *Neuroimage* 2002; 17: 825-841.
16. Woolrich MW, Ripley BD, Brady M, Smith SM. Temporal autocorrelation in univariate linear modeling of FMRI data. *Neuroimage* 2001; 14: 1370-1386.
17. Brooks JC, Beckmann CF, Miller KL, Wise RG, Porro CA, Tracey I, Jenkinson M. Physiological noise modelling for spinal functional magnetic resonance imaging studies. *NeuroImage* 2008; 39: 680-692.
18. Beckmann CF, Jenkinson M, Smith SM. General multilevel linear modeling for group analysis in FMRI. *Neuroimage* 2003; 20: 1052-1063.
19. Woolrich MW, Behrens TE, Beckmann CF, Jenkinson M, Smith SM. Multilevel linear modelling for FMRI group analysis using Bayesian inference. *Neuroimage* 2004; 21: 1732-1747.
20. Cohen ER, Ugurbil K, Kim SG. Effect of basal conditions on the magnitude and dynamics of the blood oxygenation level-dependent fMRI response. *J Cereb Blood Flow Metab* 2002; 22: 1042-1053.
21. Brown GG, Eyler Zorrilla LT, Georgy B, Kindermann SS, Wong EC, Buxton RB. BOLD and perfusion response to finger-thumb apposition after acetazolamide administration:

- differential relationship to global perfusion. *J Cereb Blood Flow Metab* 2003; 23: 829-837.
22. Ostergaard L, Engedal TS, Moreton F, Hansen MB, Wardlaw JM, Dalkara T, Markus HS, Muir KW. Cerebral small vessel disease: Capillary pathways to stroke and cognitive decline. *J Cereb Blood Flow Metab* 2016; 36: 302-325.
  23. Tidey JW, Miller ME. Smoking cessation and reduction in people with chronic mental illness. *BMJ* 2015; 351: h4065.
  24. Casetta B, Videla AJ, Bardach A, Morello P, Soto N, Lee K, Camacho PA, Hermoza Moquillaza RV, Ciapponi A. Association Between Cigarette Smoking Prevalence and Income Level: A Systematic Review and Meta-Analysis. *Nicotine Tob Res* 2016.
  25. Hayen A, Wanigasekera V, Faull OK, Campbell SF, Garry PS, Raby SJ, Robertson J, Webster R, Wise RG, Herigstad M, Pattinson KT. Opioid suppression of conditioned anticipatory brain responses to breathlessness. *Neuroimage* 2017.
  26. Herigstad M, Hayen A, Wiech K, Pattinson KT. Dyspnoea and the brain. *Respir Med* 2011; 105: 809-817.
  27. Gaglianese A, Costagli M, Ueno K, Ricciardi E, Bernardi G, Pietrini P, Cheng K. The direct, not V1-mediated, functional influence between the thalamus and middle temporal complex in the human brain is modulated by the speed of visual motion. *Neuroscience* 2015; 284: 833-844.
  28. Corfield DR, McKay LC. Regional Cerebrovascular Responses to Hypercapnia and Hypoxia. *Adv Exp Med Biol* 2016; 903: 157-167.
  29. Kastrup A, Kruger G, Glover GH, Neumann-Haefelin T, Moseley ME. Regional variability of cerebral blood oxygenation response to hypercapnia. *Neuroimage* 1999; 10: 675-681.
  30. Decaluwe K, Pauwels B, Verpoest S, Van de Voorde J. Divergent mechanisms involved in CO and CORM-2 induced vasorelaxation. *Eur J Pharmacol* 2012; 674: 370-377.
  31. Harris AD, Murphy K, Diaz CM, Saxena N, Hall JE, Liu TT, Wise RG. Cerebral blood flow response to acute hypoxic hypoxia. *NMR Biomed* 2013; 26: 1844-1852.
  32. D'Amico G, Lam F, Hagen T, Moncada S. Inhibition of cellular respiration by endogenously produced carbon monoxide. *J Cell Sci* 2006; 119: 2291-2298.
  33. Verma A, Hirsch DJ, Glatt CE, Ronnett GV, Snyder SH. Carbon monoxide: a putative neural messenger. *Science* 1993; 259: 381-384.
